# Supplementary material
Source: MDPI journal article supplement (https://www.mdpi.com/2071-1050/12/16/6496)
Supplement: s1 [file s1]

**Table S1.** Description and summary statistics for all variables at baseline used in the study.

| <b>Variables</b>                                | <b>Description</b>                                                            | <b>Mean</b> | <b>SD</b> |
|-------------------------------------------------|-------------------------------------------------------------------------------|-------------|-----------|
| Growers' age (year)                             | Ages of orchard manager                                                       | 54.3        | 9.2       |
| Education level (year)                          | Primary education is 6; Secondary education is 9; High school education is 12 | 8.1         | 3.3       |
| Cultivated area (ha)                            | The area of apples planted                                                    | 0.2         | 0.1       |
| Tree age (years)                                | Growing years since planted                                                   | 13.7        | 6.5       |
| Chemical N use (kg N ha <sup>-1</sup> )         | The amount of chemical N use per unit area                                    | 920.1       | 485.6     |
| Chemical P use (kg P ha <sup>-1</sup> )         | The amount of chemical P use per unit area                                    | 293.4       | 103.4     |
| Proportion of reflective transfer film used (%) | 1=YES; 0=NO                                                                   | 0.4         | 0.5       |
| Proportion of herbicide used (%)                | 1=YES; 0=NO                                                                   | 0.4         | 0.5       |
| Apple yield (t ha <sup>-1</sup> )               | Total apple production per unit of area                                       | 46.6        | 15.4      |
| Total cost ( $\times 10^3$ CNY)                 | All cost in apple production                                                  | 22.7        | 5.4       |
| Economic benefit ( $\times 10^3$ CNY)           | Profit of apple production                                                    | 89.8        | 44.6      |
| Observation                                     |                                                                               | 99.0        |           |
